# Supplementary material for: Design and development of hydrogen bonded molecular assemblies based on pyromellitic diimide tethered carboxylic acids as optical materials
Source: Royal Society of Chemistry journal article supplement (doi:10.1039/d2me00266c), 2023-01-01
Supplement: d2me00266c1.pdf [file d2me00266c1.pdf]

## Supporting Information

### **Design and development of hydrogen bonded molecular assemblies based on pyromellitic diimides tethered carboxylic acids as optical materials**

Raju RamPuniya<sup>‡a</sup>, Priyanka Takhar<sup>‡a</sup>, Tanmoy Kalita<sup>b</sup>, Dhruva Jyoti Kalita<sup>b</sup>, Devendra Singh<sup>\*a</sup>

<sup>a</sup>Department of Chemistry, Mohanlal Sukhadia University, Udaipur-313001, Rajasthan, INDIA.

<sup>b</sup>Department of Chemistry, Gauhati University, Guwahati-781014, Assam, INDIA.

#### **List of Contents**

Experimental: Computational and crystal structure determination details

Figure S1. HOMO and LUMO frontier MOs of the structures **3a** and **3b**

Figure S2. HOMO and LUMO frontier MOs of the structures **6a** and **6b**

Figure S3. HOMO and LUMO frontier MOs of the structures **9a** and **9b**

Figure S4. HOMO and LUMO frontier MOs of the structures **3a**, **6a** and **9a**.

Figure S54: Simulated and experimental PXRD patterns of **1a**

Figure S6: Simulated and experimental PXRD patterns of **1b**

Figure S7: Simulated and experimental PXRD patterns of **1c**

Figure S8: Simulated and experimental PXRD patterns of **2a**

Figure S9: Simulated and experimental PXRD patterns of **2b**

Figure S10: Simulated and experimental PXRD patterns of **2c**

Figure S11: TGA and DSC curves of **1a**

Figure S12: TGA and DSC curves of **1b**

Figure S13: TGA and DSC curves of **1c**

Figure S14: TGA and DSC curves of **2a**

Figure S15: TGA and DSC curves of **2b**

Figure S16: TGA and DSC curves of **2c**

Figure S17. UV-Vis spectra of host **1** and its solvates **1a**, **1b** and **1c**

Figure S18. UV-Vis spectra of host **2** and its solvates **2a**, **2b** and **2c**

Figure S19-24. Ellipsoid structures of solvates **1a**, **1b**, **1c**, and **2a**, **2b**, **2c**

Table S1: Interaction energies and relative stabilities of **9c**

Table S2: Interaction energies of structures **3a**, **3b** and **6a**, **6b** at B3LYP-D3 functional

Table S3: Gas and solvent phase (DMSO) values of interaction energies for structures **6a** and **6b**

Table S4: Crystallographic parameters of **1a**, **1b**, **1c** and **2a**, **2b**, **2c**

Table S5: Hydrogen bond parameters of **1a**, **1b**, **1c** and **2a**, **2b**, **2c**

Table S6: Coordinates of the studied structures (in Å) optimized in gas phase at B3LYP/6-31+G\* level of theory

## Experimental

### Computational Details

Hydrogen bond motifs were derived from formic acid and its interaction with DMF, DMSO and Dioxsolvent molecules as a model system. All the calculations were performed using the Gaussian09 program package in the gas phase.<sup>S1</sup> The energies of the geometries of these models were calculated by DFT<sup>S2</sup> using Becke's three-parameter exchange functional<sup>S3</sup> along with the gradient-corrected functional of Lee, Yang and Parr (B3LYP functional).<sup>S4</sup> Single point calculations at the 6-31+G\*, 6-31++G\* and 6-31++G\*\* level were performed on the fully optimized geometries of level B3LYP/6-31+G\*. The Interaction energy ( $E_{\text{int}}$ ) for each bimolecular motif was obtained by  $E_{\text{int}} = [E_{\text{for bimolecular structure}} - (E_{\text{for formic acid}} + E_{\text{for interacting solvent molecule}})]$ . The relative stability of a particular motif over another motif was calculated by subtracting the value of lower energy motif from the higher energy motif.

### Crystal Structure Determination

Crystals were coated with Paratone oil, and the diffraction data were collected at 173 K with MoK $\alpha$  radiation on a Rigaku Rapid AutoDiffractionmeter equipped with a graphite crystal incident beam monochromator. The RapidAuto software<sup>S5</sup> was used for data collection and data processing. The

structures were solved by direct method and refined by full-matrix least-squares calculation with the SHELXTL software package.<sup>S6</sup> All non-hydrogen atoms were refined anisotropically; the hydrogen atoms were assigned isotropic displacement coefficients  $U(H) = 1.2U(C)$  and  $1.5U(C_{\text{methyl}})$ , and their coordinates were allowed to ride on their respective atoms. In the structures of solvates **2a**, **2b** and **2c**, all three carbon atoms in the aliphatic part attached with cyclic imide cores were found to be disordered. These disordered atoms were refined by sharing two carbon atoms at one position having half occupancies and then hydrogen atoms were fixed at respective positions. Crystallographic details and hydrogen bond parameters are listed in Table S4 and Table S5, respectively.

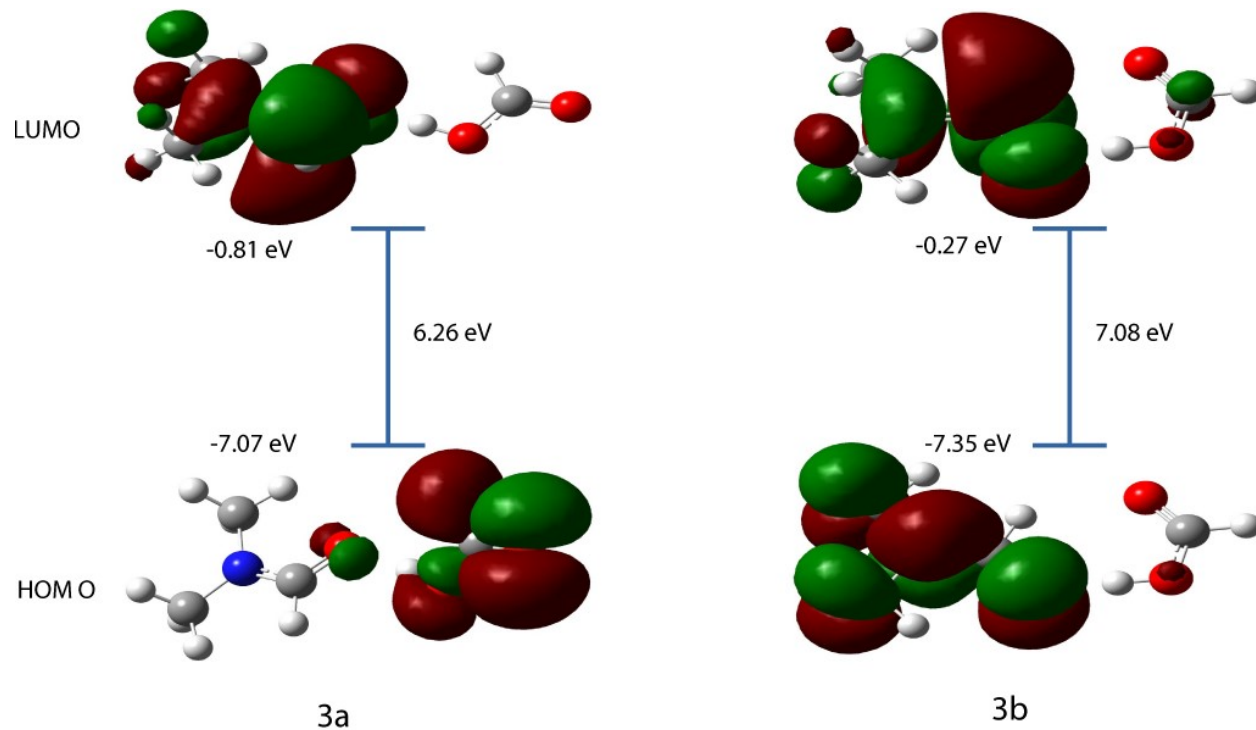

**Figure S1.** HOMO and LUMO frontier molecular orbitals of structures **3a** and **3b** at B3LYP/631+G\* level.

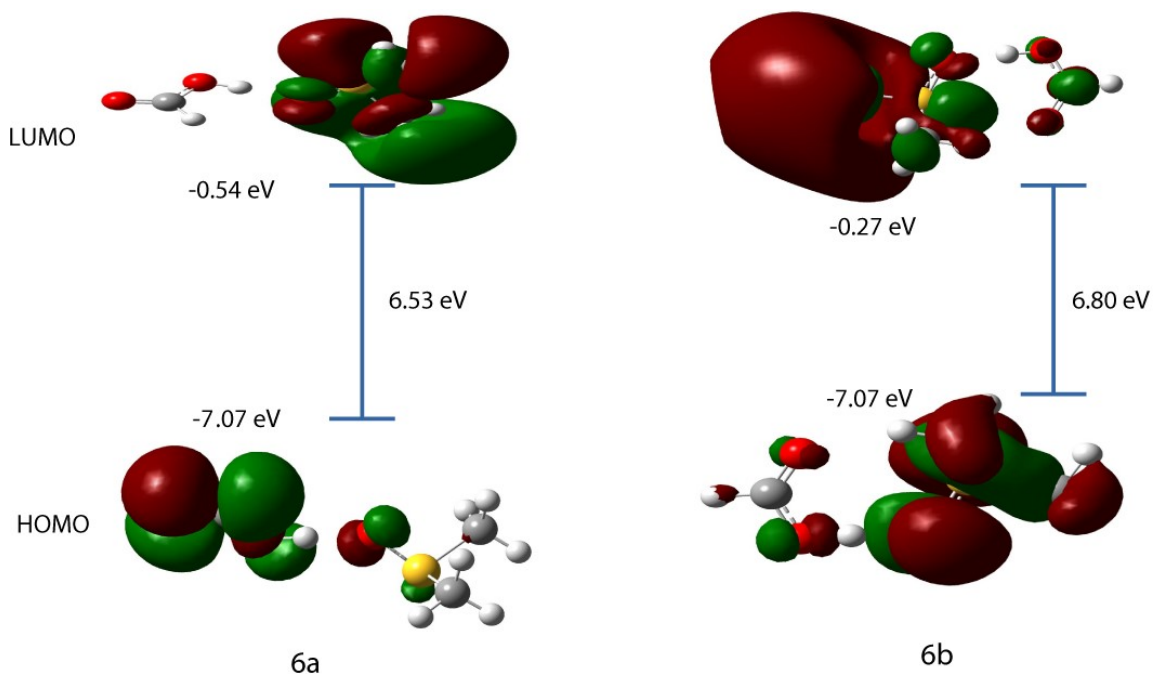

**Figure S2.** HOMO and LUMO frontier molecular orbitals of structures **6a** and **6b** at B3LYP/631+G\* level.

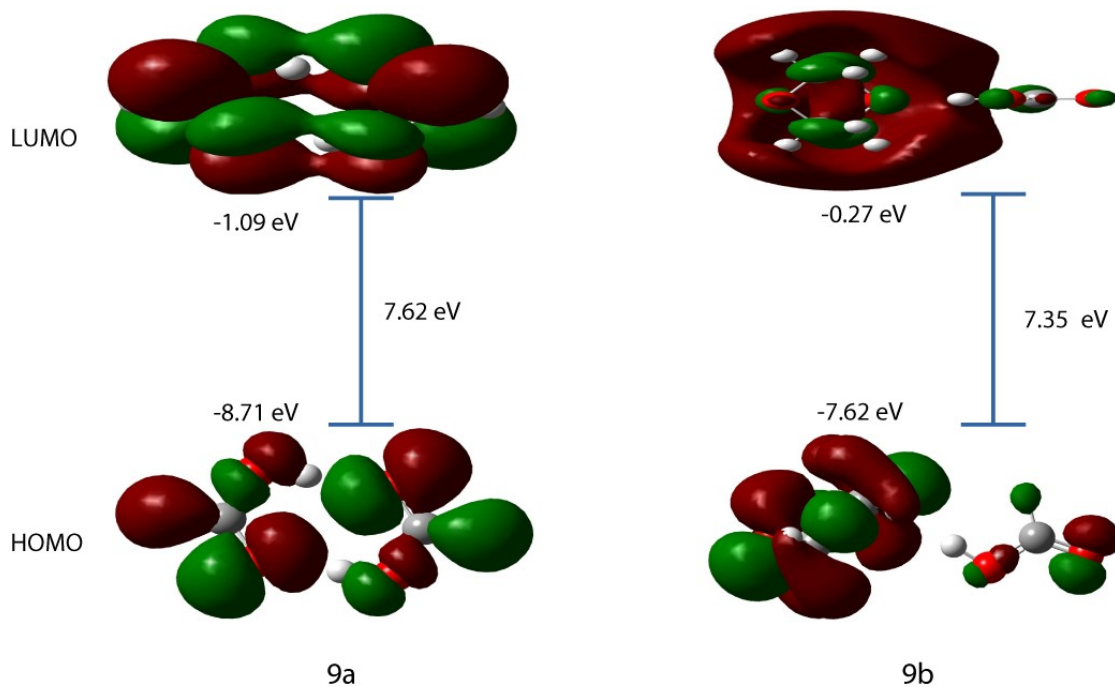

**Figure S3.** HOMO and LUMO frontier molecular orbitals of structures **9a** and **9b** at B3LYP/6-31+G\* level.

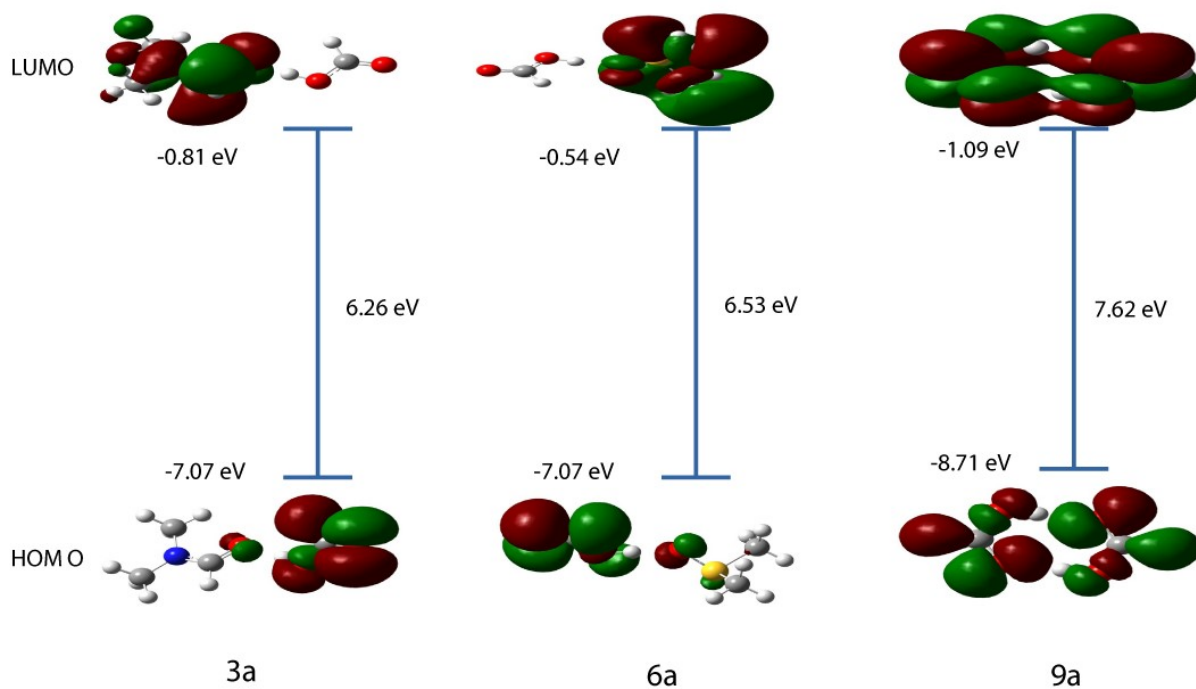

**Figure S4.** HOMO and LUMO frontier molecular orbitals of structures **3a**, **6a** and **9a** at B3LYP/6-31+G\* level.

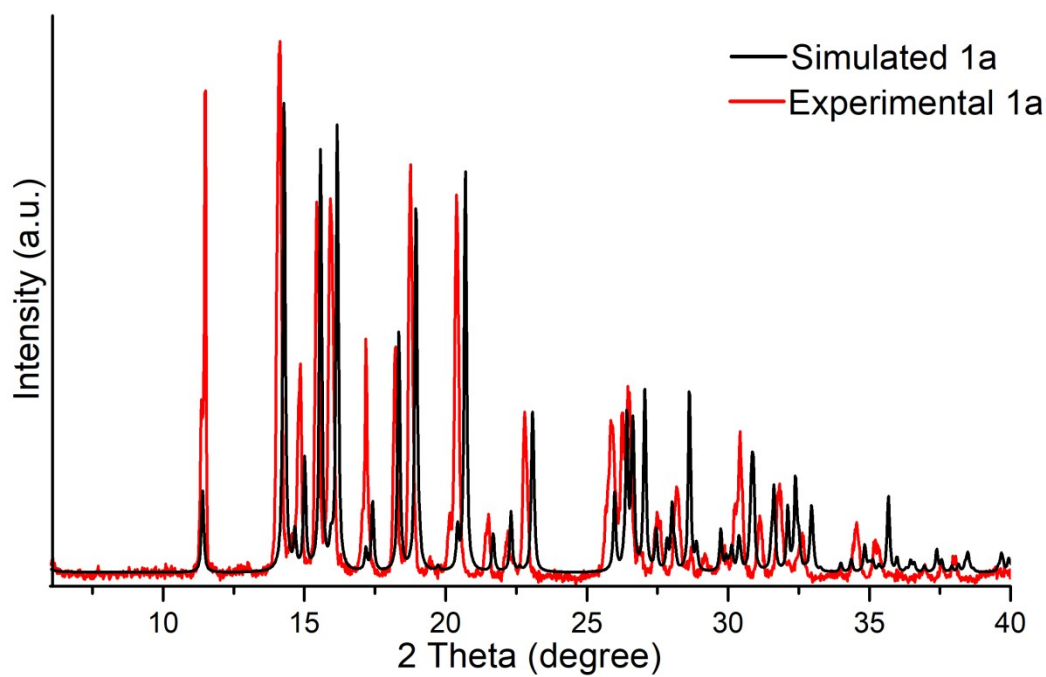

**Figure S5.** Simulated (black) and experimental (red) PXRD patterns of solvate **1a**.

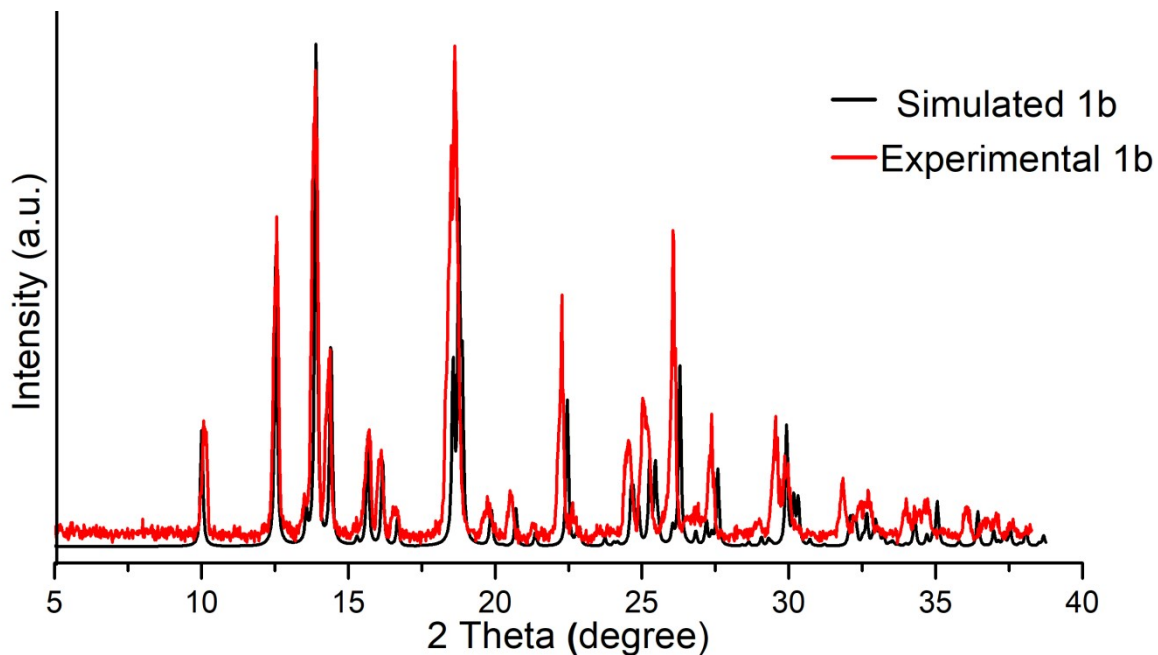

**Figure S6.** Simulated (black) and experimental (red) PXR D patterns of solvate **1b**.

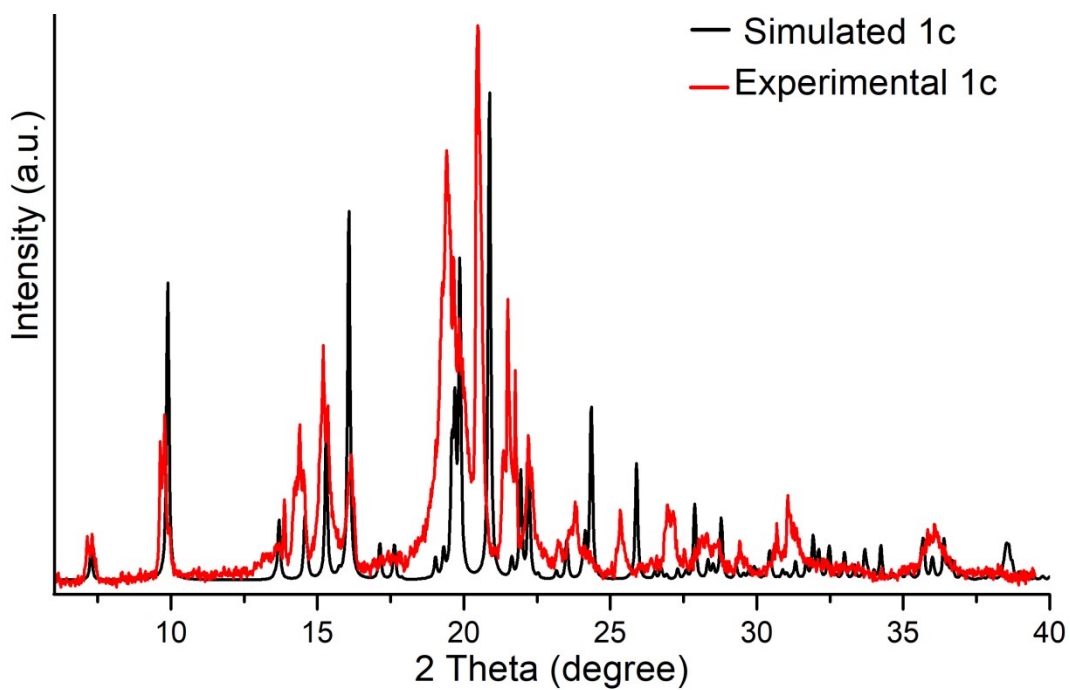

**Figure S7.** Simulated (black) and experimental (red) PXR D patterns of solvate **1c**.

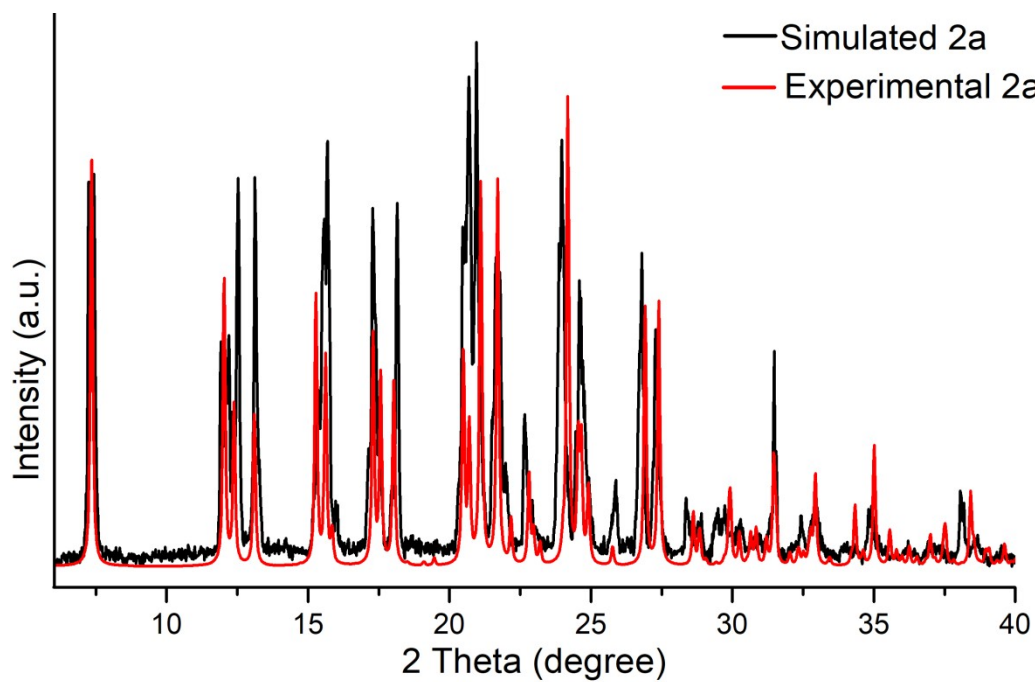

**Figure S8.** Simulated (black) and experimental (red) PXR D patterns of solvate **2a**.

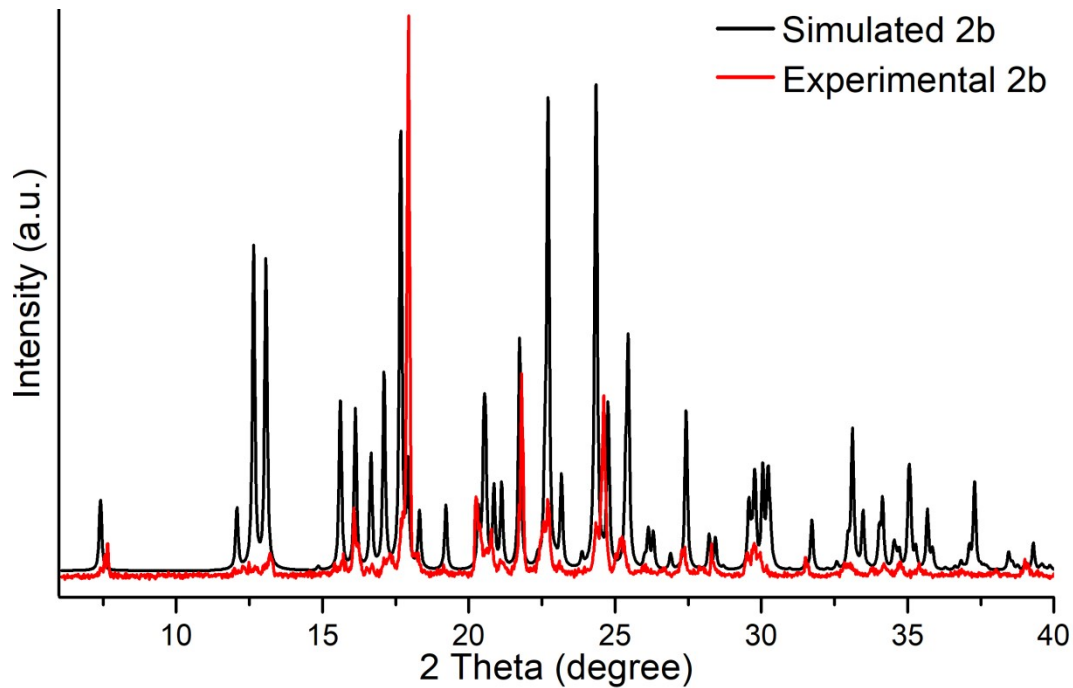

**Figure S9.** Simulated (black) and experimental (red) PXR D patterns of solvate **2b**.

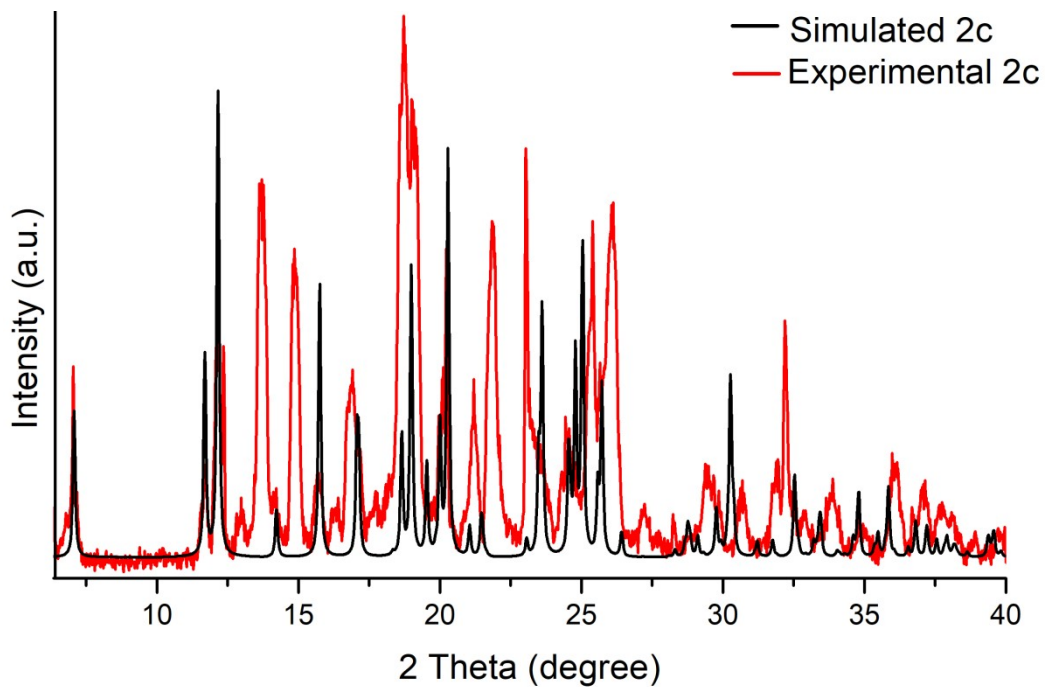

**Figure S10.** Simulated (black) and experimental (red) PXRD patterns of solvate **2c**.

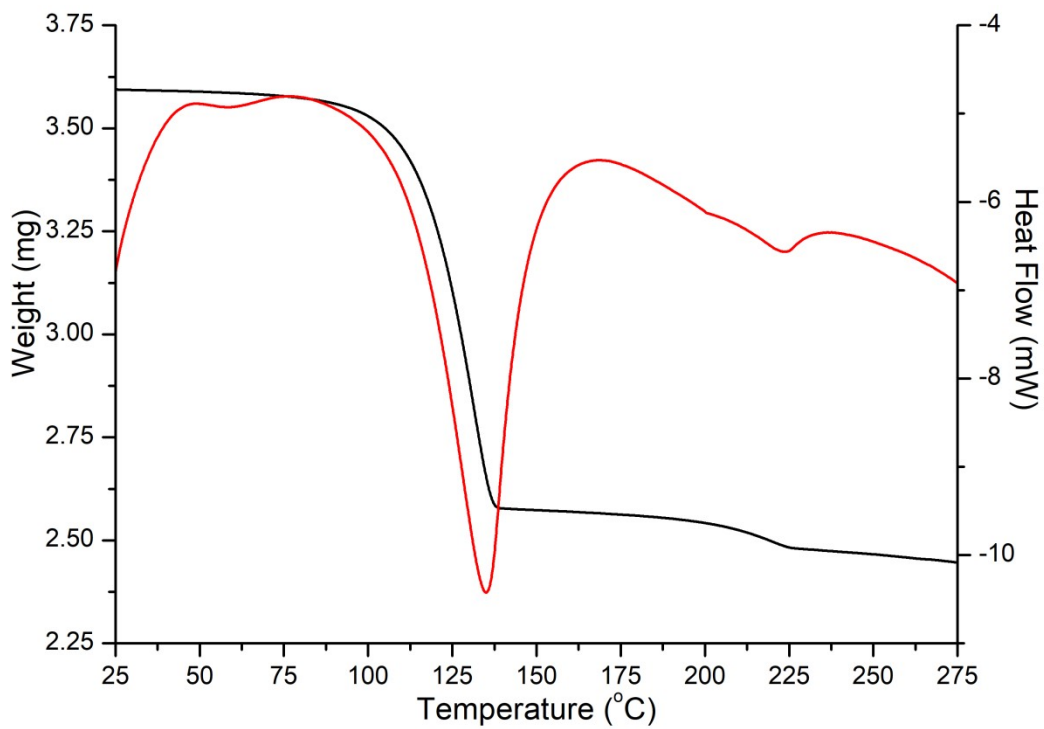

**Figure S11.** TGA (black) and DSC (red) curves of solvate **1a**.



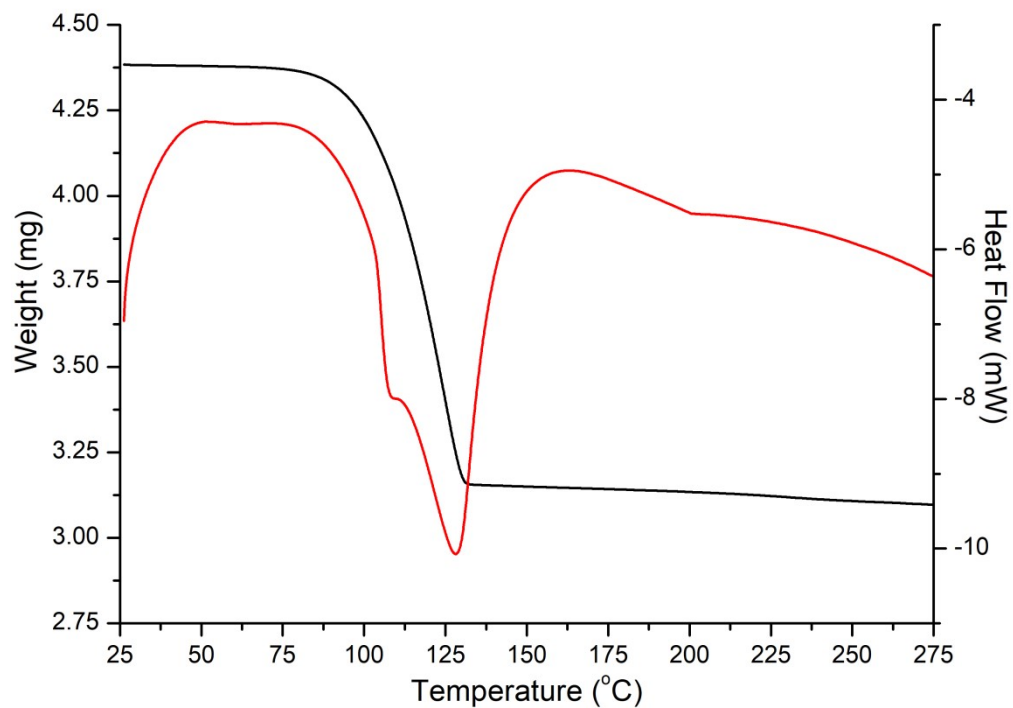

**Figure S12.** TGA (black) and DSC (red) curves of solvate **1b**.

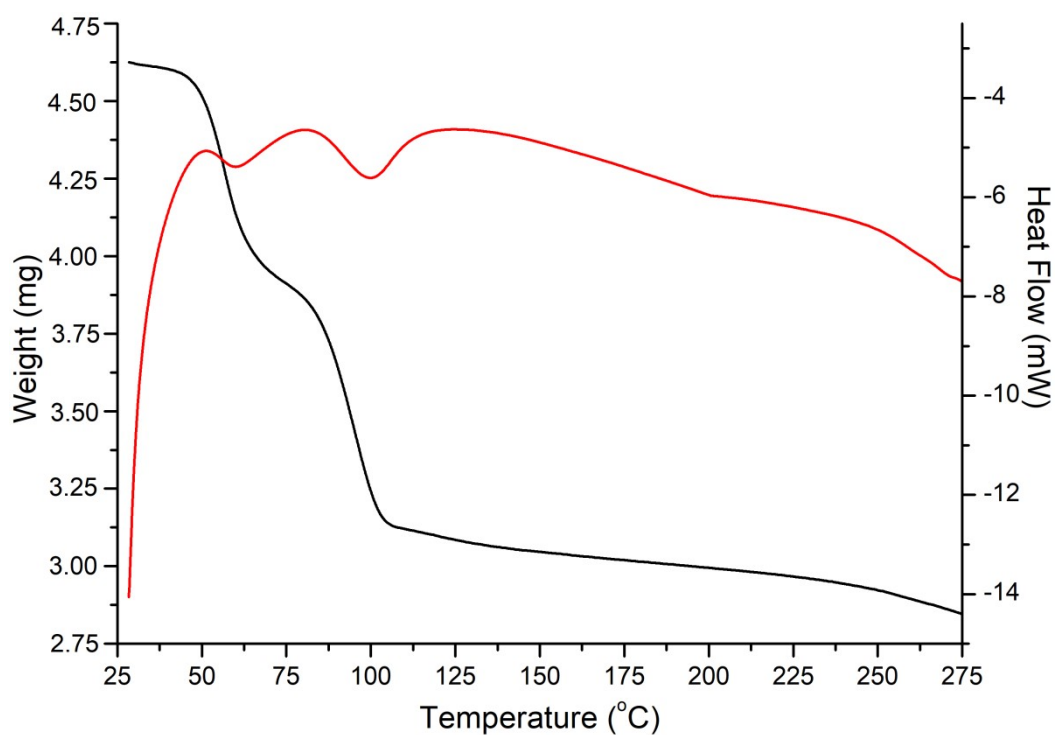

**Figure S13.** TGA (black) and DSC (red) curves of solvate **1c**.

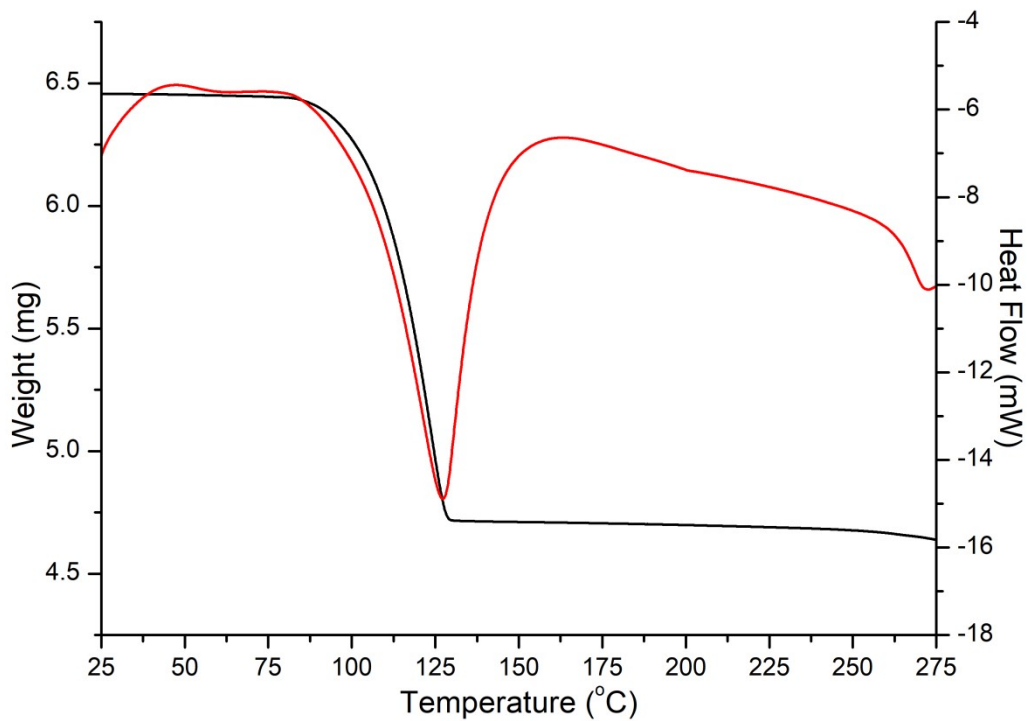

**Figure S14.** TGA (black) and DSC (red) curves of solvate **2a**.

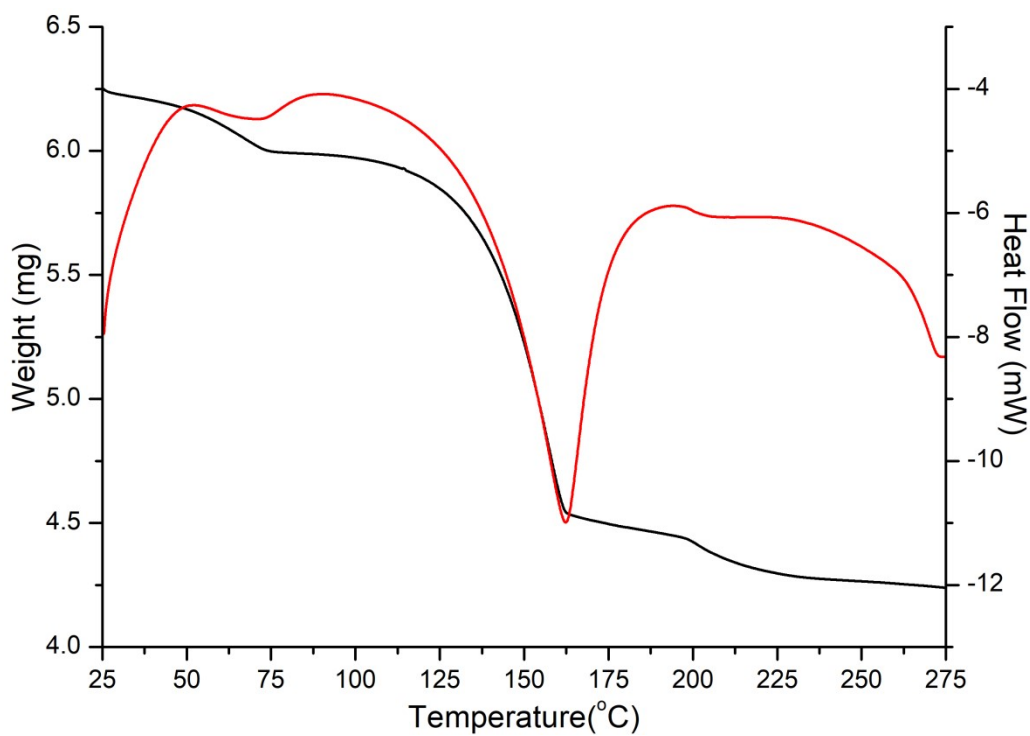

**Figure S15.** TGA (black) and DSC (red) curves of solvate **2b**.

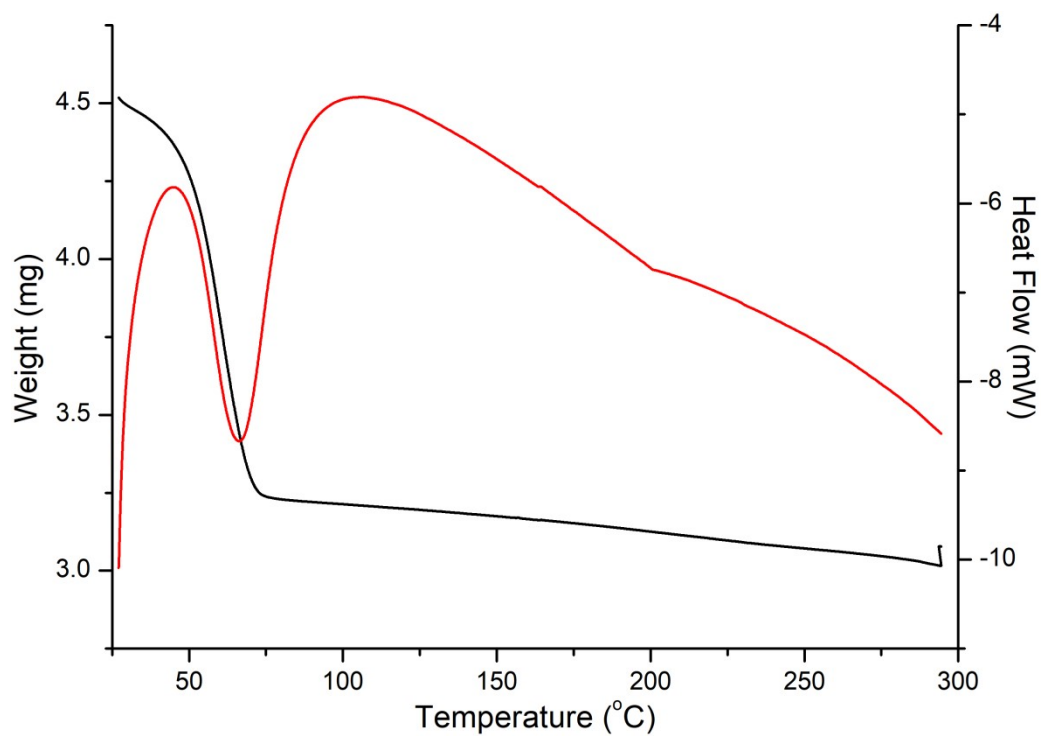

**Figure S16.** TGA (black) and DSC (red) curves of solvate **2c**.

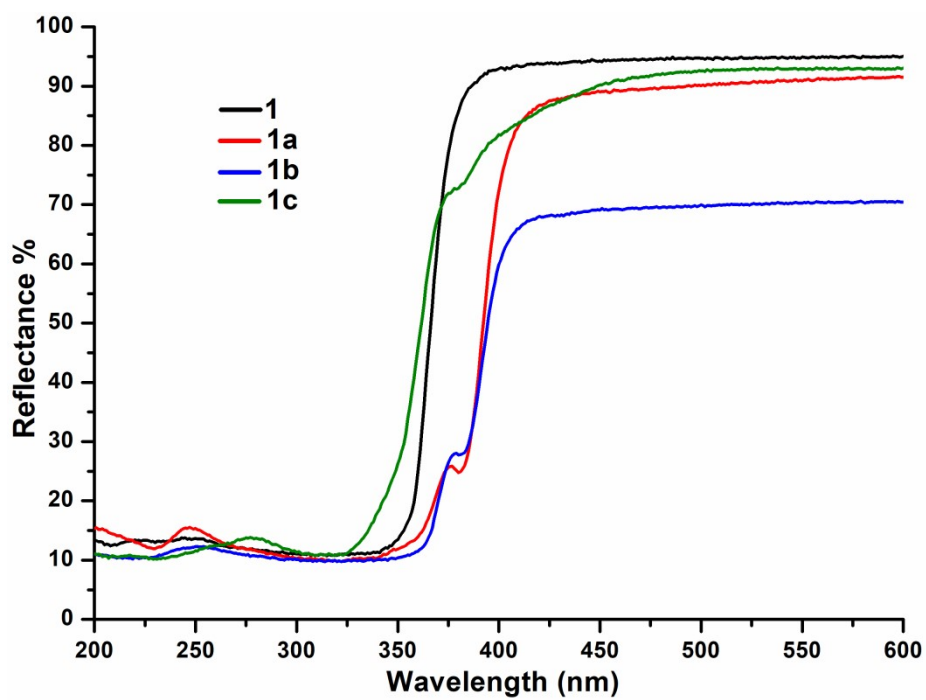

**FigureS17.** Solid state UV-Vis spectra of host **1** and its solvates **1a**, **1b** and **1c**.

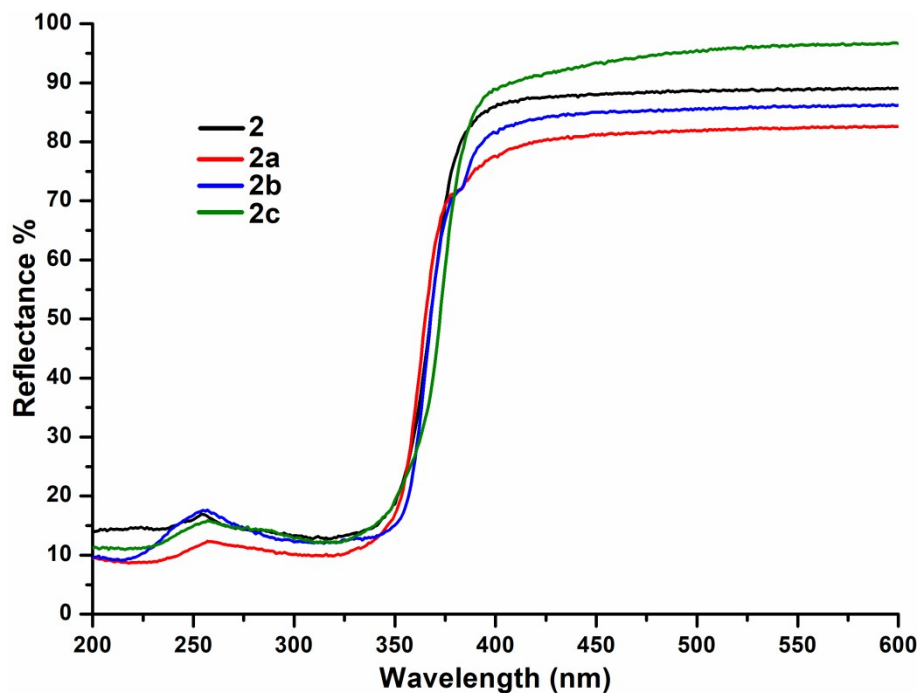

**FigureS18.** Solid state UV-Vis spectra of host **2** and its solvates **2a**, **2b** and **2c**.

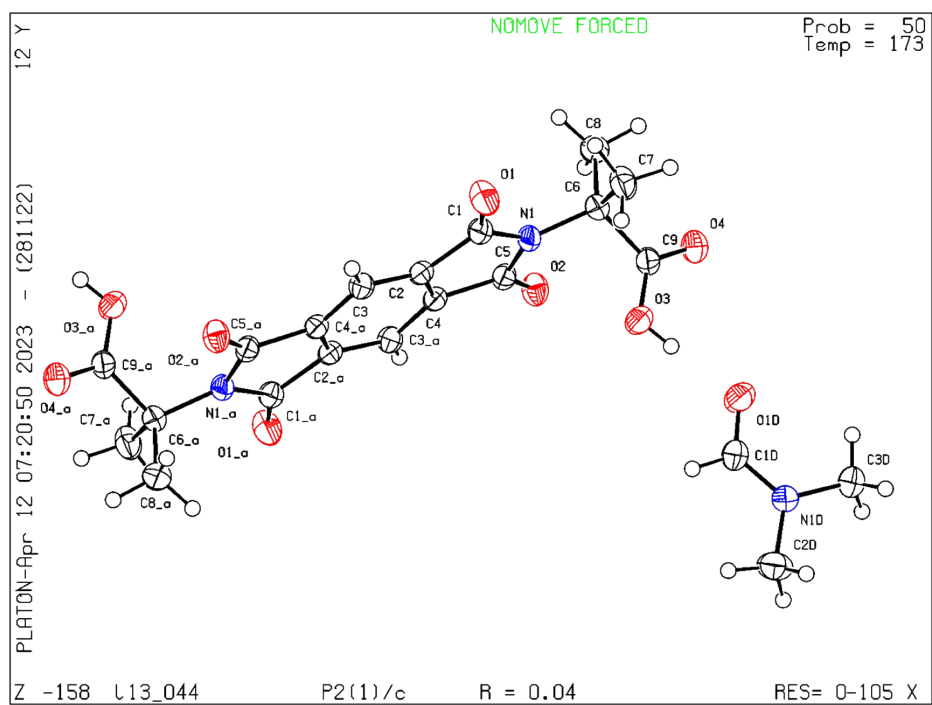

**FigureS19.** Atomic displacement (ellipsoid plot) structure of solvate **1a**.

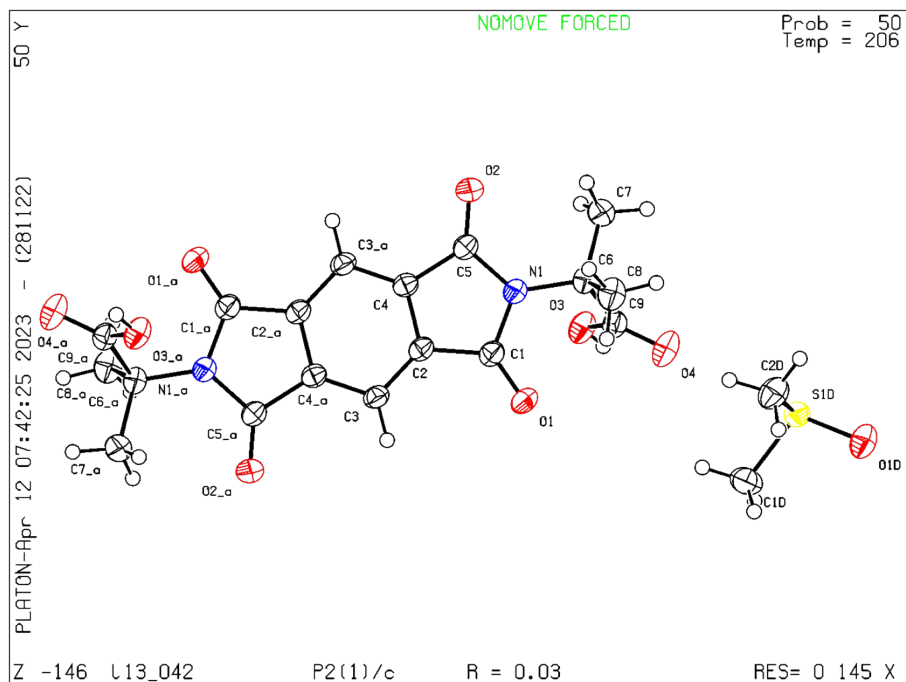

**FigureS20.** Atomic displacement (ellipsoid plot) structure of solvate **1b**.

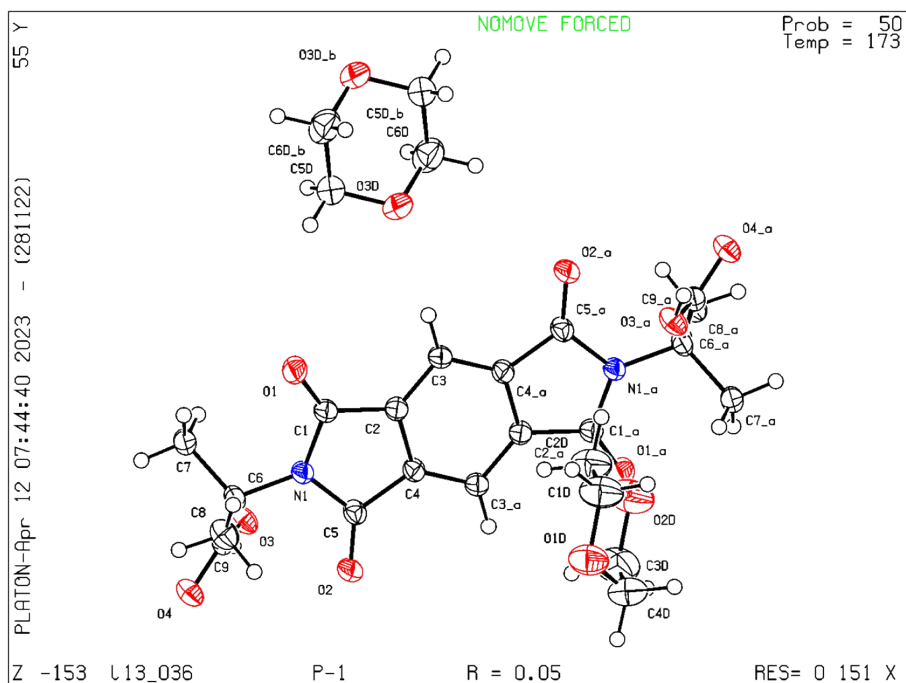

**FigureS21.** Atomic displacement (ellipsoid plot) structure of solvate **1c**.

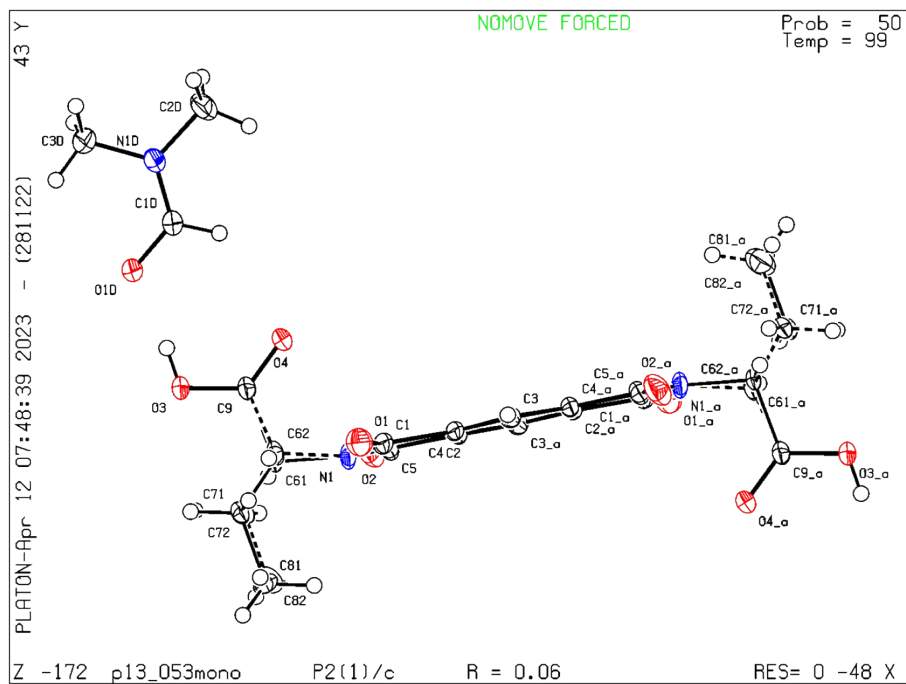

**FigureS22.** Atomic displacement (ellipsoid plot) structure of solvate **2a**.

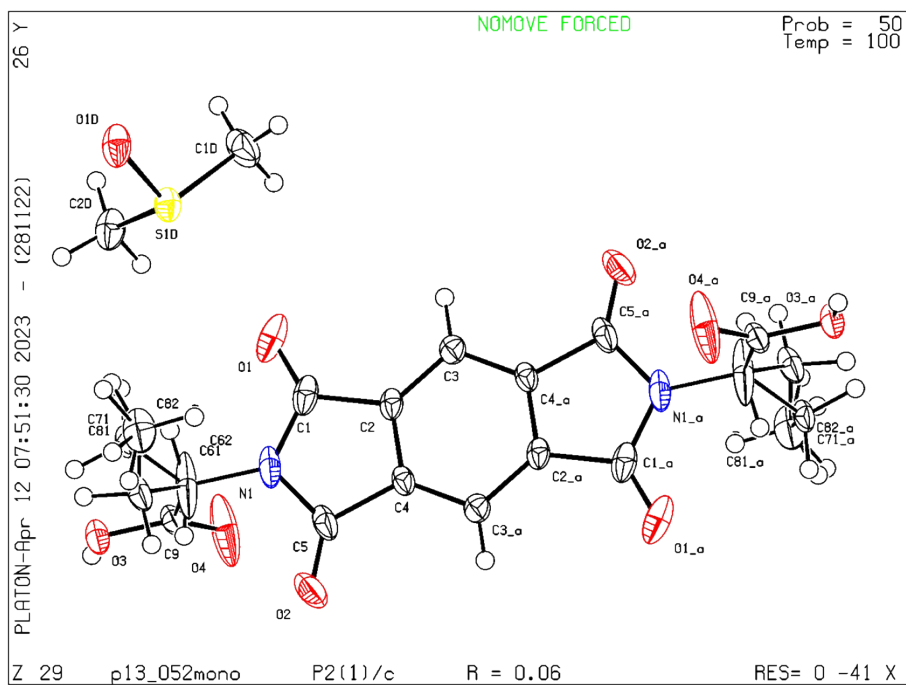

**FigureS23.** Atomic displacement (ellipsoid plot) structure of solvate **2b**.

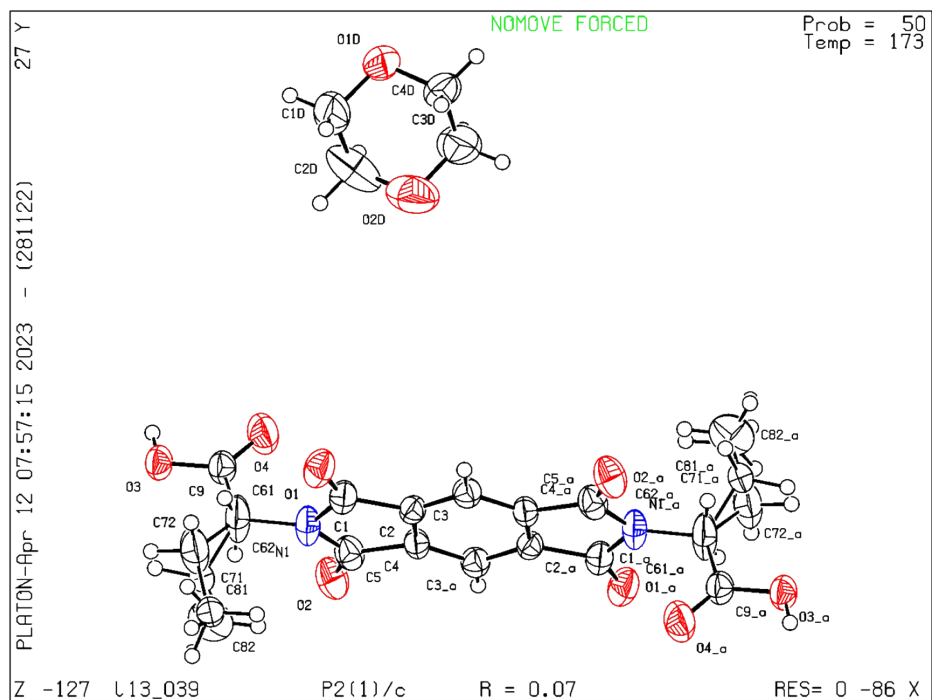

**FigureS24.** Atomic displacement (ellipsoid plot) structure of solvate **2b**.

**Table S1.** Interaction energies ( $E_{int}$ ) and relative stabilities of optimized structures **9a**, **9b** and **9c** (in kcal/mol).

| Functional/Basis sets | Interaction energies of <b>9c</b> | Stability of <b>9a</b> over <b>9c</b> | Stability of <b>9b</b> over <b>9c</b> |
|-----------------------|-----------------------------------|---------------------------------------|---------------------------------------|
| B3LYP/6-31+G*         | -4.58                             | 11.26                                 | 4.21                                  |
| B3LYP/6-31++G*        | -4.58                             | 11.31                                 | 4.21                                  |
| B3LYP/6-31++G**       | -4.52                             | 11.14                                 | 4.15                                  |

**Table S2:** Interaction energies ( $E_{\text{int}}$ ) of optimized structures **3a**, **3b** and **6a**, **6b** at different basis sets of B3LYP-D3functional.

| Functional/Basis sets | Interaction energy (kcal/mol) |           |            |           |
|-----------------------|-------------------------------|-----------|------------|-----------|
|                       | Structures                    |           | Structures |           |
|                       | <b>3a</b>                     | <b>3b</b> | <b>6a</b>  | <b>6b</b> |
| B3LYP-D3/6-31+G*      | -18.82                        | -25.10    | -18.83     | -25.10    |
| B3LYP-D3/6-31++G*     | -18.83                        | -25.10    | -18.83     | -25.10    |
| B3LYP-D3/6-31++G**    | -25.10                        | -31.38    | -18.83     | -18.83    |

**Gibbs free energy of structure 9a:**

$$\Delta_r G^\circ (298 \text{ K}) = \sum (\epsilon_0 + G \text{ corr})_{\text{product}} - \sum (\epsilon_0 + G \text{ corr})_{\text{reactant}}$$

$$= [-379.53 - 2 \times (-189.76)] \text{ a.u.}$$

$$= -0.01 \text{ a.u.} = -6.28 \text{ kcal/mol}$$

where,  $\sum (\epsilon_0 + G \text{ corr})_{\text{product}}$  = Sum of electronic and thermal Free Energies of dimer **9a**

and  $\sum (\epsilon_0 + G \text{ corr})_{\text{reactant}}$  = Sum of electronic and thermal Free Energies of acid monomer.

The negative value of change in free energy suggests that the dimer **9a** is thermodynamically more stable compared to its monomers.

**Table S3:** Interaction energies of structures **6a** and **6b** both in the gas and solvent (DMSO) phases.

| Functional/Basis sets | Interaction energy (kcal/mol) |           |               |           |
|-----------------------|-------------------------------|-----------|---------------|-----------|
|                       | Gas phase                     |           | Solvent phase |           |
|                       | <b>6a</b>                     | <b>6b</b> | <b>6a</b>     | <b>6b</b> |
| B3LYP/6-31+G*         | -8.12                         | -13.79    | -8.85         | -12.55    |
| B3LYP/6-31++G*        | -8.37                         | -13.73    | -25.10        | -25.10    |
| B3LYP/6-31++G**       | -8.37                         | -13.79    | -25.10        | -25.10    |

**Table S4.** Crystallographic parameters of solvates **1a**, **1b**, **1c** and **2a**, **2b**, **2c**.



| Compounds                      | <b>1a</b>                                                      | <b>1b</b>                                                                     | <b>1c</b>                                                      | <b>2a</b>                                                      | <b>2b</b>                                                                     | <b>2c</b>                                                      |
|--------------------------------|----------------------------------------------------------------|-------------------------------------------------------------------------------|----------------------------------------------------------------|----------------------------------------------------------------|-------------------------------------------------------------------------------|----------------------------------------------------------------|
| Empirical formula              | C <sub>24</sub> H <sub>30</sub> N <sub>4</sub> O <sub>10</sub> | C <sub>22</sub> H <sub>28</sub> N <sub>2</sub> O <sub>10</sub> S <sub>2</sub> | C <sub>30</sub> H <sub>40</sub> N <sub>2</sub> O <sub>14</sub> | C <sub>24</sub> H <sub>30</sub> N <sub>4</sub> O <sub>10</sub> | C <sub>22</sub> H <sub>28</sub> N <sub>2</sub> O <sub>10</sub> S <sub>2</sub> | C <sub>26</sub> H <sub>32</sub> N <sub>2</sub> O <sub>12</sub> |
| Formula weight                 | 534.52                                                         | 544.58                                                                        | 652.64                                                         | 534.52                                                         | 544.58                                                                        | 564.54                                                         |
| Wavelength                     | 0.71073 Å                                                      | 0.71073 Å                                                                     | 0.71073 Å                                                      | 0.70000 Å                                                      | 0.70000 Å                                                                     | 0.71073 Å                                                      |
| Crystal system                 | Monoclinic                                                     | Monoclinic                                                                    | Triclinic                                                      | Monoclinic                                                     | Monoclinic                                                                    | Monoclinic                                                     |
| Space group                    | <i>P2<sub>1</sub>/c</i>                                        | <i>P2<sub>1</sub>/c</i>                                                       | <i>P-1</i>                                                     | <i>P2<sub>1</sub>/c</i>                                        | <i>P2<sub>1</sub>/c</i>                                                       | <i>P2<sub>1</sub>/c</i>                                        |
| Unit cell dimensions (Å)       | a = 15.625(3)<br>b = 6.8164(14)<br>c = 12.177(2)               | a = 16.231(3)<br>b = 7.0373(14)<br>c = 11.685(2)                              | a = 6.4872(13)<br>b = 9.976(2)<br>c = 12.810(3)                | a = 12.632(3)<br>b = 9.2860(19)<br>c = 11.744(2)               | a = 12.768(3)<br>b = 9.2840(19)<br>c = 11.394(2)                              | a = 12.514(3)<br>b = 9.5933(19)<br>c = 11.344(2)               |
| Volume (Å <sup>3</sup> )       | 1296.2(4)                                                      | 1292.6(4)                                                                     | 783.2(3)                                                       | 1310.5(5)                                                      | 1260.7(5)                                                                     | 1361.4(5)                                                      |
| Z                              | 2                                                              | 2                                                                             | 1                                                              | 2                                                              | 2                                                                             | 2                                                              |
| Density (Mg/m <sup>3</sup> )   | 1.370                                                          | 1.399                                                                         | 1.384                                                          | 1.355                                                          | 1.435                                                                         | 1.377                                                          |
| Abs coeff (mm <sup>-1</sup> )  | 0.108                                                          | 0.263                                                                         | 0.110                                                          | 0.068                                                          | 0.269                                                                         | 0.110                                                          |
| F(000)                         | 564                                                            | 572                                                                           | 346                                                            | 564                                                            | 572                                                                           | 596                                                            |
| Index ranges                   | -20<=h<=20,<br>-8<=k<=8,<br>-15<=l<=15                         | -21<=h<=21,<br>-9<=k<=9,<br>-13<=l<=15                                        | -8<=h<=8,<br>-11<=k<=12,<br>-16<=l<=16                         | -17<=h<=17,<br>-12<=k<=12,<br>-16<=l<=16                       | -17<=h<=17,<br>-13<=k<=13,<br>-16<=l<=16                                      | -16<=h<=16,<br>-12<=k<=12,<br>-14<=l<=14                       |
| Completeness to 2θ             | 99.8 %                                                         | 98.7 %                                                                        | 99.2 %                                                         | 99.0 %                                                         | 99.3 %                                                                        | 99.9 %                                                         |
| Data / restraints / parameters | 2958 / 0 / 177                                                 | 2919 / 0 / 168                                                                | 3560 / 0 / 211                                                 | 3782 / 1 / 215                                                 | 3664 / 1 / 203                                                                | 3117 / 0 / 212                                                 |
| Gof (F <sup>2</sup> )          | 1.077                                                          | 1.063                                                                         | 1.102                                                          | 1.065                                                          | 1.075                                                                         | 1.083                                                          |
| R indices [I>2σ(I)]            | R1 = 0.0408,<br>wR2 = 0.1026                                   | R1 = 0.0339,<br>wR2 = 0.0880                                                  | R1 = 0.0493,<br>wR2 = 0.1284                                   | R1 = 0.0554,<br>wR2 = 0.1434                                   | R1 = 0.0517,<br>wR2 = 0.1442                                                  | R1 = 0.0662,<br>wR2 = 0.1670                                   |
| R indices (all)                | R1 = 0.0579,                                                   | R1 = 0.0420,                                                                  | R1 = 0.1026,                                                   | R1 = 0.0599,                                                   | R1 = 0.0584,                                                                  | R1 = 0.1405,                                                   |

|          |              |              |              |              |              |              |
|----------|--------------|--------------|--------------|--------------|--------------|--------------|
| data)    | wR2 = 0.1148 | wR2 = 0.0934 | wR2 = 0.1691 | wR2 = 0.1469 | wR2 = 0.1506 | wR2 = 0.2197 |
| CCDC No. | 2205752      | 2205753      | 2205754      | 2205755      | 2205756      | 2205757      |

**Table S5.** Hydrogen bond parameters (Å and °) of solvates **1a**, **1b**, **1c** and **2a**, **2b**, **2c**.

| Compounds | D-H...A                        | d <sub>D-H</sub> | d <sub>H...A</sub> | d <sub>D...A</sub> | ∠D-H...A |
|-----------|--------------------------------|------------------|--------------------|--------------------|----------|
| <b>1a</b> | O3-H3...O1D [-x+2, -y, -z+1]   | 0.84             | 1.71               | 2.55(16)           | 172.7    |
|           | C1D-H1D...O4 [2-x, -y, 1-z]    | 0.95             | 2.33               | 3.24               | 159.6    |
|           | C2D-H2D3...O4 [1+x, y, z]      | 0.98             | 2.56               | 3.50               | 162.8    |
|           | C7-H7C...O2 [x, -1+y, z]       | 0.98             | 2.49               | 3.27               | 136.8    |
| <b>1b</b> | O3-H3...O1D [-x, -y, -z+2]     | 0.83             | 1.71               | 2.54(15)           | 173.7    |
|           | C1D-H1D2...O4                  | 0.97             | 2.65               | 3.29               | 123.3    |
|           | C7-H7A...O1[x, -1+y, z]        | 0.97             | 2.69               | 3.40               | 130.5    |
|           | C1D-H1D3...O1D [-x, -½+y, ½-z] | 0.97             | 2.64               | 3.57               | 161.8    |
| <b>1c</b> | O3-H3...O4 [-x, -y+1, -z+1]    | 0.84             | 1.80               | 2.64(2)            | 173.6    |
|           | C8-H8C...O2 [-1+x, y, z]       | 0.98             | 2.69               | 3.48               | 137.2    |
|           | C7-H7B...O4[1+x, 1+y, -1+z]    | 0.98             | 2.62               | 3.42               | 139.5    |
|           | C2D-H2D2...O3 [-x, 1-y, 1-z]   | 0.98             | 2.58               | 3.46               | 149.2    |
|           | C4DH4D2...O3[x, y, 1+z]        | 0.99             | 2.68               | 3.49               | 139.4    |
|           | C7-H7C...O2D [-x, 1-y, 1-z]    | 0.98             | 2.61               | 3.50               | 150.5    |
| <b>2a</b> | C3-H3A...O3D [-x, 1-y, 1-z]    | 0.95             | 2.39               | 3.34               | 174.6    |
|           | O3-H3...O1D [-x+1, -y+2, -z+1] | 0.84             | 1.69               | 2.53(14)           | 175.0    |
|           | C1D-H1D...O4                   | 0.95             | 2.46               | 3.18               | 132.5    |
|           | C3D-H3D3...O3                  | 0.98             | 2.70               | 3.26               | 117.1    |
|           | C2D-H2D3...O1 [x, 1+y, z]      | 0.98             | 2.54               | 3.27               | 131.1    |
|           | C3D-H3D2...O1 [1-x, 2-y, 1-z]  | 0.98             | 2.59               | 3.45               | 146.02   |
| <b>2b</b> | C71-H71B...O4                  | 0.99             | 2.65               | 3.44               | 137.4    |
|           | C2D-H2D3...O1D [x, ½-y, -½+z]  | 0.98             | 2.66               | 3.18               | 113.2    |
|           | O3-H3...O1D [-x+1, -y+1, -z]   | 0.84             | 1.72               | 2.56(19)           | 168.7    |
|           | C1D-H1D3...O4 [x, -1+y, z]     | 0.98             | 2.71               | 3.52               | 140.1    |
|           | C1D-H1D2...O1                  | 0.98             | 2.625              | 3.3                | 126.2    |
|           | C2D-H2D2...O1                  | 0.98             | 2.60               | 3.28               | 126.8    |
| <b>2c</b> | C71-H71A...O4 [x, ½-y, -½+z]   | 0.99             | 2.51               | 3.35               | 143.0    |
|           | C2D-H2D1...O1D [-x, -½+y, ½-z] | 0.98             | 2.63               | 3.38               | 133.2    |

|           |                               |      |      |         |       |
|-----------|-------------------------------|------|------|---------|-------|
| <b>2c</b> | O3-H3...O1D [-x+1, -y, -z+1]  | 0.84 | 1.86 | 2.70(3) | 178.3 |
|           | C1D-H1D1...O4 [x, 1-y, 1-z]   | 0.99 | 2.48 | 3.25    | 134.5 |
|           | C1D-H1D2...O1 [-x, 1-y, 1-z]  | 0.99 | 2.50 | 3.48    | 169.7 |
|           | C3D-H3D1...O1 [-x, 1-y, 1-z]  | 0.99 | 2.66 | 3.32    | 123.8 |
|           | C3-H3A...O1D                  | 0.95 | 2.64 | 3.42    | 140.0 |
|           | C71-H71B...O4 [-x, -½+y, ½-z] | 0.99 | 2.40 | 3.21    | 139.0 |

**Table S6:** Coordinates of the studied compounds (in Angstroms) optimized in gas phase at B3LYP/6-31+G\* level of theory.

### Structure - 3a

#### Atoms Coordinates (Å)

|   | <b>X</b>  | <b>Y</b>  | <b>Z</b>  |
|---|-----------|-----------|-----------|
| C | 3.350190  | -0.263226 | -0.136799 |
| O | 4.532268  | -0.024300 | -0.197305 |
| O | 2.440669  | 0.607668  | 0.316184  |
| H | 2.918239  | -1.231407 | -0.453824 |
| H | 1.529497  | 0.214035  | 0.272964  |
| C | -1.035411 | 0.400187  | 0.045051  |
| O | -0.088381 | -0.387730 | 0.156996  |
| N | -2.333321 | 0.044307  | -0.027631 |
| H | -0.875187 | 1.489172  | -0.004274 |
| C | -2.730353 | -1.358443 | 0.025765  |
| H | -3.395435 | -1.528688 | 0.880933  |

|   |           |           |           |
|---|-----------|-----------|-----------|
| H | -3.259552 | -1.635594 | -0.893930 |
| H | -1.835786 | -1.972514 | 0.131225  |
| C | -3.389867 | 1.037696  | -0.160736 |
| H | -3.956032 | 0.873764  | -1.085733 |
| H | -4.081485 | 0.978540  | 0.688534  |
| H | -2.954816 | 2.040149  | -0.189168 |

### Structure - 3b

|   |           |           |           |
|---|-----------|-----------|-----------|
| C | 3.097583  | 0.302312  | 0.000185  |
| O | 2.364588  | 1.275425  | 0.001388  |
| O | 2.716408  | -0.967419 | -0.000722 |
| H | 4.195196  | 0.378919  | -0.000224 |
| H | 1.709972  | -1.033568 | -0.000451 |
| C | -0.555920 | -0.025882 | -0.000775 |
| O | 0.032164  | -1.118150 | -0.000552 |
| N | -1.896373 | 0.119101  | 0.000234  |
| H | 0.009176  | 0.917074  | -0.001685 |
| C | -2.780018 | -1.040074 | 0.001199  |
| H | -3.420484 | -1.026434 | 0.891760  |
| H | -3.418177 | -1.029993 | -0.891096 |
| H | -2.170584 | -1.944126 | 0.003706  |

|   |           |          |           |
|---|-----------|----------|-----------|
| C | -2.514062 | 1.437218 | -0.000830 |
| H | -3.140671 | 1.567765 | -0.892039 |
| H | -3.141642 | 1.568580 | 0.889551  |
| H | -1.738951 | 2.207794 | -0.000743 |

**Structure - 6a**

|   |           |           |           |
|---|-----------|-----------|-----------|
| C | -3.106102 | -0.114932 | 0.299247  |
| O | -4.299406 | -0.093333 | 0.112220  |
| O | -2.207746 | 0.301449  | -0.599878 |
| H | -2.654028 | -0.484507 | 1.239050  |
| H | -1.286405 | 0.192458  | -0.242873 |
| S | 1.559688  | 0.022151  | -0.427597 |
| O | 0.282421  | -0.024132 | 0.423661  |
| C | 2.551043  | -1.415766 | 0.110068  |
| H | 2.017835  | -2.310935 | -0.218688 |
| H | 3.538452  | -1.377052 | -0.360478 |
| H | 2.630754  | -1.408459 | 1.200939  |
| C | 2.596251  | 1.329781  | 0.318372  |
| H | 3.581491  | 1.333029  | -0.158311 |
| H | 2.090951  | 2.280562  | 0.132751  |
| H | 2.676629  | 1.154115  | 1.395014  |

**Structure - 6b**

|   |           |           |           |
|---|-----------|-----------|-----------|
| C | -2.768033 | 0.105779  | -0.123458 |
| O | -2.079638 | 1.091381  | -0.326584 |
| O | -2.332028 | -1.094542 | 0.226003  |
| H | -3.864663 | 0.113366  | -0.215235 |
| H | -1.326020 | -1.086341 | 0.313821  |
| S | 1.107987  | -0.047966 | -0.399339 |
| O | 0.332190  | -1.069607 | 0.454491  |
| C | 2.859362  | -0.501383 | -0.152413 |
| H | 3.006605  | -1.478327 | -0.618704 |
| H | 3.500820  | 0.243167  | -0.634223 |
| H | 3.064948  | -0.565810 | 0.919872  |
| C | 1.113188  | 1.513178  | 0.547723  |
| H | 1.779164  | 2.230780  | 0.057614  |
| H | 0.084096  | 1.877713  | 0.530771  |
| H | 1.435970  | 1.309611  | 1.573111  |

**Structure - 9a**

|   |           |          |           |
|---|-----------|----------|-----------|
| C | -0.122807 | 1.923667 | -0.000065 |
| O | -1.125429 | 1.219859 | -0.000592 |
| O | 1.125429  | 1.501625 | 0.000604  |

|   |           |           |           |
|---|-----------|-----------|-----------|
| H | -0.179719 | 3.019192  | -0.000087 |
| H | 1.159035  | 0.499306  | 0.000381  |
| C | 0.122807  | -1.923667 | -0.000065 |
| O | 1.125429  | -1.219859 | -0.000592 |
| O | -1.125429 | -1.501625 | 0.000604  |
| H | 0.179719  | -3.019192 | -0.000087 |
| H | -1.159035 | -0.499306 | 0.000381  |

**Structure - 9b**

|   |           |           |           |
|---|-----------|-----------|-----------|
| C | 3.141116  | -0.033762 | -0.214549 |
| O | 2.543556  | -0.362523 | -1.218905 |
| O | 2.584186  | 0.308944  | 0.948701  |
| H | 4.237914  | 0.019176  | -0.146622 |
| H | 1.588194  | 0.257580  | 0.870352  |
| C | -0.558103 | -1.127291 | 0.265038  |
| C | -2.078744 | -1.189105 | 0.214085  |
| C | -2.180154 | 1.128875  | -0.156655 |
| C | -0.659949 | 1.214528  | -0.106000 |
| H | -0.120915 | -1.305102 | -0.726488 |
| H | -2.412933 | -2.135412 | -0.221879 |
| H | -2.584952 | 1.861356  | -0.861452 |

|   |           |           |           |
|---|-----------|-----------|-----------|
| H | -0.331014 | 2.158826  | 0.338134  |
| H | -0.230116 | 1.113500  | -1.112428 |
| H | -2.600833 | 1.324543  | 0.842910  |
| H | -2.494158 | -1.097542 | 1.231116  |
| H | -0.155798 | -1.855549 | 0.975576  |
| O | -0.136961 | 0.168859  | 0.734677  |
| O | -2.600829 | -0.152886 | -0.614564 |

**Structure - 9c**

|   |           |           |           |
|---|-----------|-----------|-----------|
| C | 3.171204  | 0.000031  | -0.160487 |
| O | 4.328826  | -0.000463 | 0.175988  |
| O | 2.148249  | 0.000817  | 0.708427  |
| H | 2.852672  | -0.000209 | -1.220325 |
| H | 1.284583  | 0.000294  | 0.226013  |
| C | -2.072999 | -1.175528 | 0.463676  |
| C | -1.053175 | -1.190351 | -0.668097 |
| C | -1.053584 | 1.190271  | -0.668334 |
| C | -2.073188 | 1.175340  | 0.463618  |
| H | -1.557831 | -1.222705 | 1.436565  |
| H | -0.362883 | -2.034015 | -0.576070 |
| H | -0.363554 | 2.034180  | -0.576644 |



|   |           |           |           |
|---|-----------|-----------|-----------|
| H | -2.755828 | 2.026581  | 0.382539  |
| H | -1.557732 | 1.222530  | 1.436341  |
| H | -1.560054 | 1.241516  | -1.642788 |
| H | -1.559503 | -1.241996 | -1.642603 |
| H | -2.755463 | -2.026888 | 0.382338  |
| O | -2.877157 | -0.000178 | 0.397127  |
| O | -0.246662 | 0.000092  | -0.629995 |

## References

- S1. *GAUSSIAN03, Revision B.05*; Gaussian, Inc.: Pittsburgh, PA, 2003.
- S2. P. Hohenberg and W. Kohn, *Phys. Rev.*, 1964, **136**, B864–B871.
- S3. A. D. Becke, *J. Chem. Phys.*, 1993, **98**, 5648–5652.
- S4. C. Lee, W. Yang and R. G. Parr, *Phys. Rev. B: Condens. Matter Mater. Phys.*, 1988, **37**, 785–789.
- S5. Rapid Auto software, R-Axis series, Cat. No. 9220B101, Rigaku Corporation.
- S6. G. M. Sheldrick, *Acta Crystallogr. A: Found. Adv.*, 2008, **A64**, 112–122.
